# Supplementary material
Source: publisher figshare collection journal article supplement (https://acs.figshare.com/ndownloader/files/4195528)
Supplement: Supplementary file 1 [file 4195528]

## **Supporting information**

# Impact of treatment processes on the occurrence of perfluoroalkyl acids in the drinking water production chain

*CHRISTIAN ESCHAUZIER*

*ERWIN BEERENDONK*

*PETRA SCHOLTE-VEENENDAAL*

*PIM DE VOOGT*

## Contents

|                                       |   |
|---------------------------------------|---|
| Chemicals used .....                  | 3 |
| Analysis method .....                 | 3 |
| Drinking water production scheme..... | 4 |

## Figures

|                                                                                                                                                                                                                                     |    |
|-------------------------------------------------------------------------------------------------------------------------------------------------------------------------------------------------------------------------------------|----|
| Figure S1 Pre-treatment of the source water (in Nieuwegein).....                                                                                                                                                                    | 4  |
| Figure S2 Dune filtration following pre-treatment and transport from Nieuwegein.....                                                                                                                                                | 5  |
| Figure S3 Post-treatment (1) following dune infiltration.....                                                                                                                                                                       | 6  |
| Figure S4 Post treatment (2) following Dune filtration.....                                                                                                                                                                         | 7  |
| Figure S5. PFOS concentration in the Lek canal around Nieuwegein [1-3].....                                                                                                                                                         | 8  |
| Figure S6. Calibration line PFOA with samples, lowest samples on the calibration line are blanks.....                                                                                                                               | 8  |
| Figure S7. Carbon chain length of the perfluorocarboxylate and perfluorosulfonates vs. the removal in the first (lead) GAC treatment step and second (lag) treatment step.....                                                      | 9  |
| Figure S8 PFOS peaks, the branched PFOS peak at retention time 9.78 was not integrated, peaks 10.29 and 10.44 were used as branched isomers and peak 10.88 the linear PFOS (corresponding to the <sup>13</sup> C labeled PFOS)..... | 10 |
| Figure S9 Scheme of the setup of the GAC filter beds in the Leiduin water treatment facility.....                                                                                                                                   | 11 |

## Tables

|                                                                                                                                         |    |
|-----------------------------------------------------------------------------------------------------------------------------------------|----|
| Table S1 Characteristics of locations sampled in the drinking water treatment processes (locations shown in Figures S1 to S4). .....    | 12 |
| Table S2 Recoveries of the available mass labeled internal standards, field blank concentrations and LOQs <sup>1</sup> .....            | 13 |
| Table S3 Mass transitions and retention times of perfluoroalkyl carboxylic acids. ....                                                  | 14 |
| Table S4 Mass transitions and retention times of perfluoroalkyl sulfonates. ....                                                        | 16 |
| Table S5 Analytes and internal standards used .....                                                                                     | 17 |
| Table S6 Concentrations of PFAS (ng/L) observed in the river Rhine at Lobith in the year 2009 [data from 5].....                        | 18 |
| Table S7 Concentrations of PFOS and PFOA (ng/L) observed in the Lek canal at Nieuwegein in the period 2006 to 2008 [data from 1-3]..... | 18 |
| Table S8 Average PFAA concentration at the effluent of three sampled young GAC beds and three sampled old GAC beds. ....                | 18 |

## Chemicals used

The non-labeled calibration standards and the isotopically labeled internal standards of Perfluorocarboxylates and Perfluorosulfonates were obtained from Wellington Laboratories (Ontario, Canada). A list with abbreviations of the non-labeled and labeled standards is shown in Table S1. Methanol of ULC/MS grade was obtained from Biosolve (Valkenswaard, Netherlands).  $\text{NH}_4\text{OH}$  of 33 weight % was obtained from Sigma Aldrich (St. Louis, USA). Materials used for sample treatment and analysis included SPE Oasis WAX 3cc (60 mg) cartridges (particle size: 30  $\mu\text{m}$ , pore size: 80  $\text{\AA}$ ) from Waters (Wexford, Ireland); Acrodisc LC13 GHPPall 0.2  $\mu\text{m}$  filters from Pall Corporation (NY, USA); 1 L and 250 mL polypropylene (PP) tubes with screw caps from Nalgene (Rochester, USA) and 2 mL PP vials from Supelco (Bellefonte, USA).

## Analytical method

Approximately 250 mL sample was carefully weighed in a methanol pre-washed (three times MeOH and three times with the sample) PP tube. The internal standards (60 ng) (See Table S5 and S6 for which internal standards) were subsequently added to the water sample. Cartridges were conditioned by eluting with 4 mL of 0.1%  $\text{NH}_4\text{OH}$  in methanol and 4 mL of nanopure water, consecutively. Water samples were subsequently filtered over the SPE cartridge via a vacuum extraction manifold, the eluent was discarded and the cartridge was dried under a gentle vacuum air flow. The cartridge was then washed with 2 mL 40/60 vol.% MeOH/ $\text{H}_2\text{O}$  mixture which was discarded after controlling for two samples that no PFASs were present in the washing solution. The compounds retained on the SPE cartridge were desorbed with 1 mL of 2%  $\text{NH}_4\text{OH}$  in methanol which was then filtered through an Acrodisc LC 13 GHPPall in a 2 mL PP vial and stored at 4  $^{\circ}\text{C}$  prior analysis.

The analytical protocol was described in detail before [4]. Briefly, PFAS were analyzed by injecting 20  $\mu\text{L}$  from the extract into a High Performance Liquid Chromatograph (HPLC, Shimadzu, Kyoto, Japan) connected to a tandem mass spectrometer (4000 Q Trap, Applied Biosystems, Toronto, Canada) operating in the negative ionization mode with scheduled MRM. An ACE 3 C18-300 column (ID 2.1 mm; length 150 mm, particle size 3  $\mu\text{m}$ , Advanced Chromatography Technologies, Aberdeen, Scotland) was used and the pre-column used for lowering the background of PFAS from the HPLC system was a Pathfinder 300 PS C18 column (ID 4.6 mm; length 50 mm; Shimadzu, Duisburg, Germany), placed before the injection valve.

## Drinking water production scheme

1 water is taken in at the Lek canal near Nieuwegein. 2 the water is coagulated by addition of ferric chloride and subsequently sedimentated; the deep extraction wells are used as emergency water supply might surface water be contaminated and therefore not in function 3 rapid sand filtration and pH neutralization with caustic soda (see Figure S for a schematic representation); 4 After the pre-treatment steps water is transported to the post-treatment location in the Western part of the Netherlands.

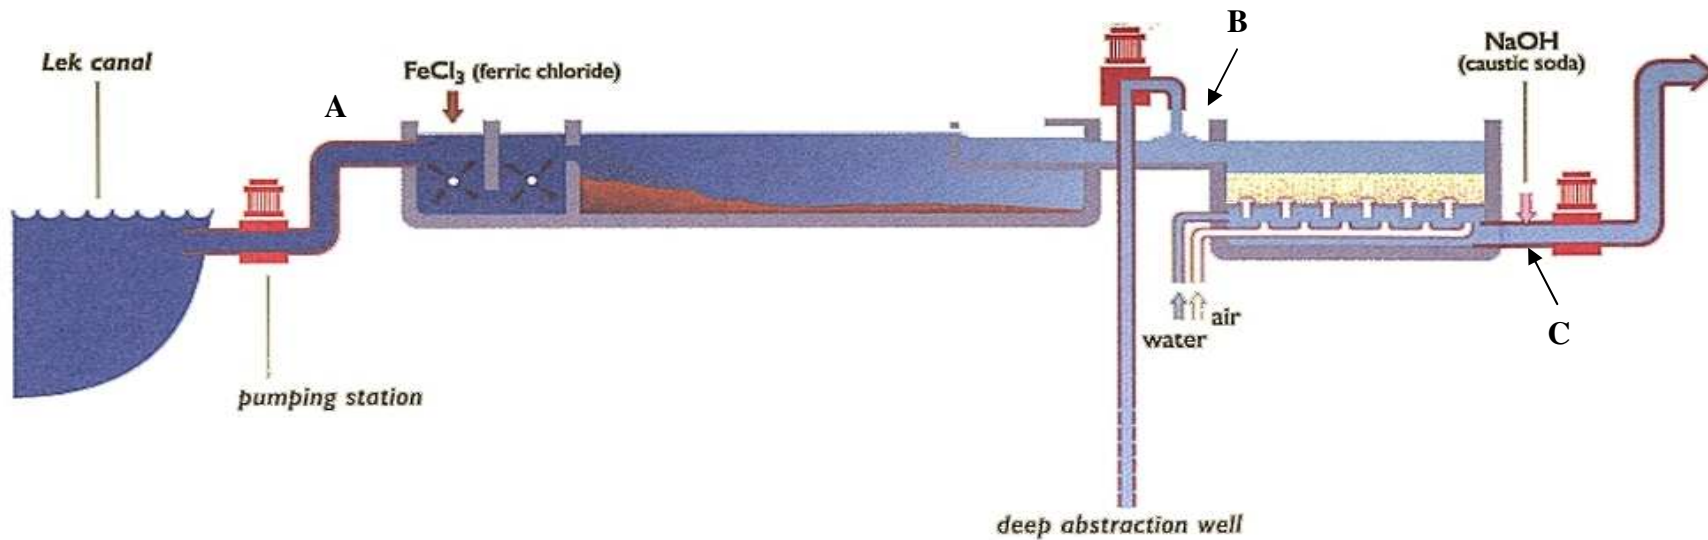

Figure S1 Pre-treatment of the source water (in Nieuwegein)

5 infiltration of the water in the dune area via a system of distribution lakes and recharge channels; 6 drainage of the water after a residence time of approximately 60 to 400 days and an aquifer passage of 40 to 100 meters and collection of the water in the Oranjekom;

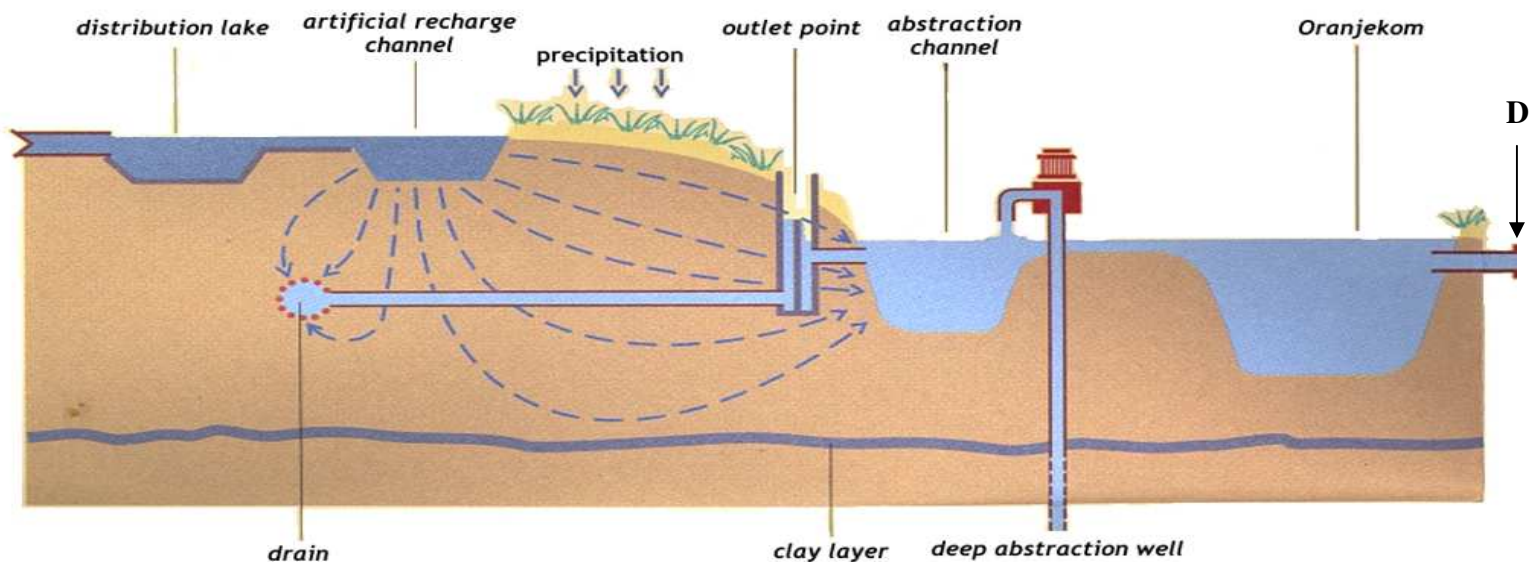

Figure S2 Dune filtration following pre-treatment and transport from Nieuwegein.

7 rapid sand filtration; 8 ozonization

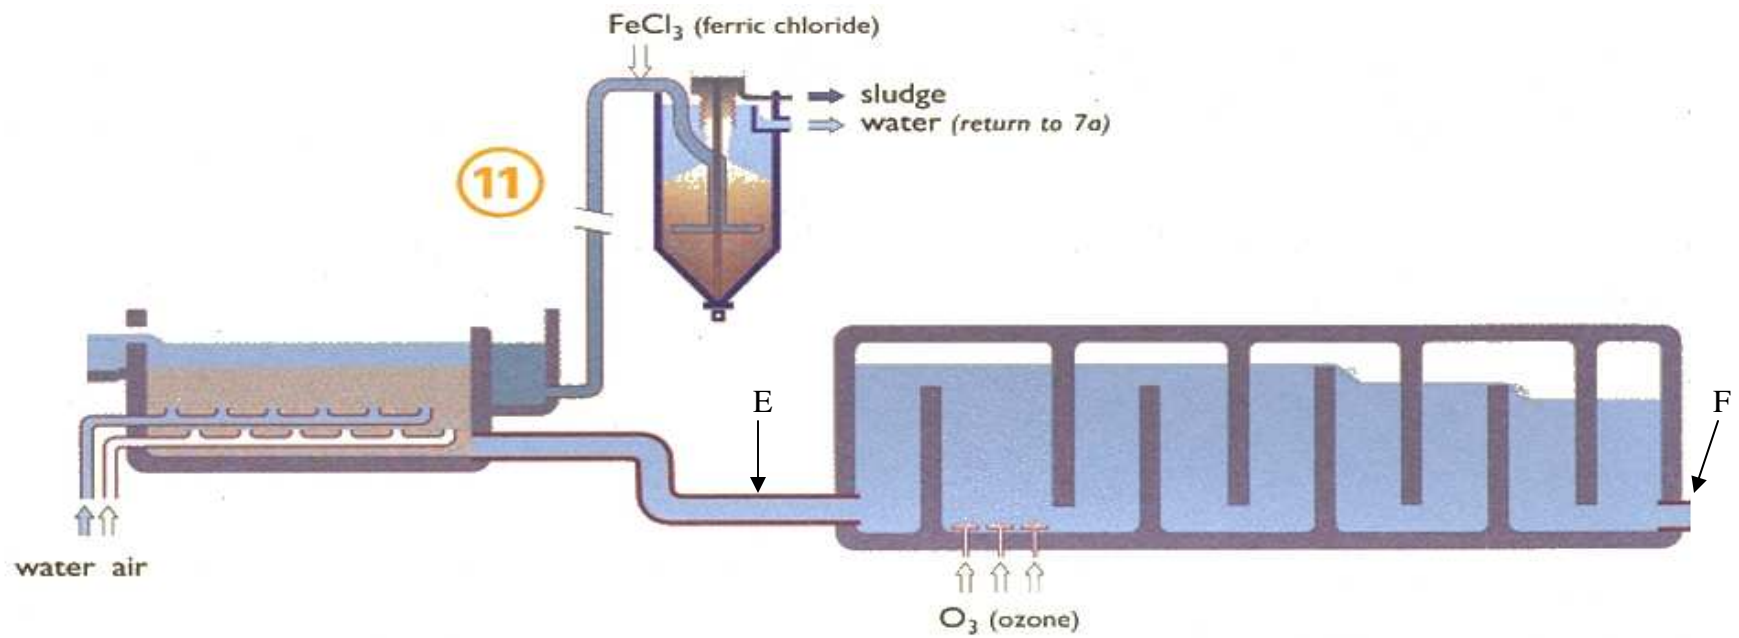

Figure S3 Post-treatment (1) following dune infiltration

9 Softening of the water in a pellet reactor with addition of NaOH and hydrochloric addition to neutralize pH; 10 two step activated carbon filtration operated in series (first and second stage); water is distributed evenly over 19-20 first stage beds, collected and redistributed over 19-20 second stage beds. The contact time of the water is twice 23 min and regeneration frequency of GAC beds is approximately 2.5 years. When a first stage GAC bed is exhausted, a second stage bed is switched to the first stage position; the coal in the exhausted bed is regenerated and after return of the regenerated coal the bed starts in second stage again 11 backwash water purification; 12 slow sand filtration; 13 storage to buffer the variation in water demand and finally distribution to the consumers.

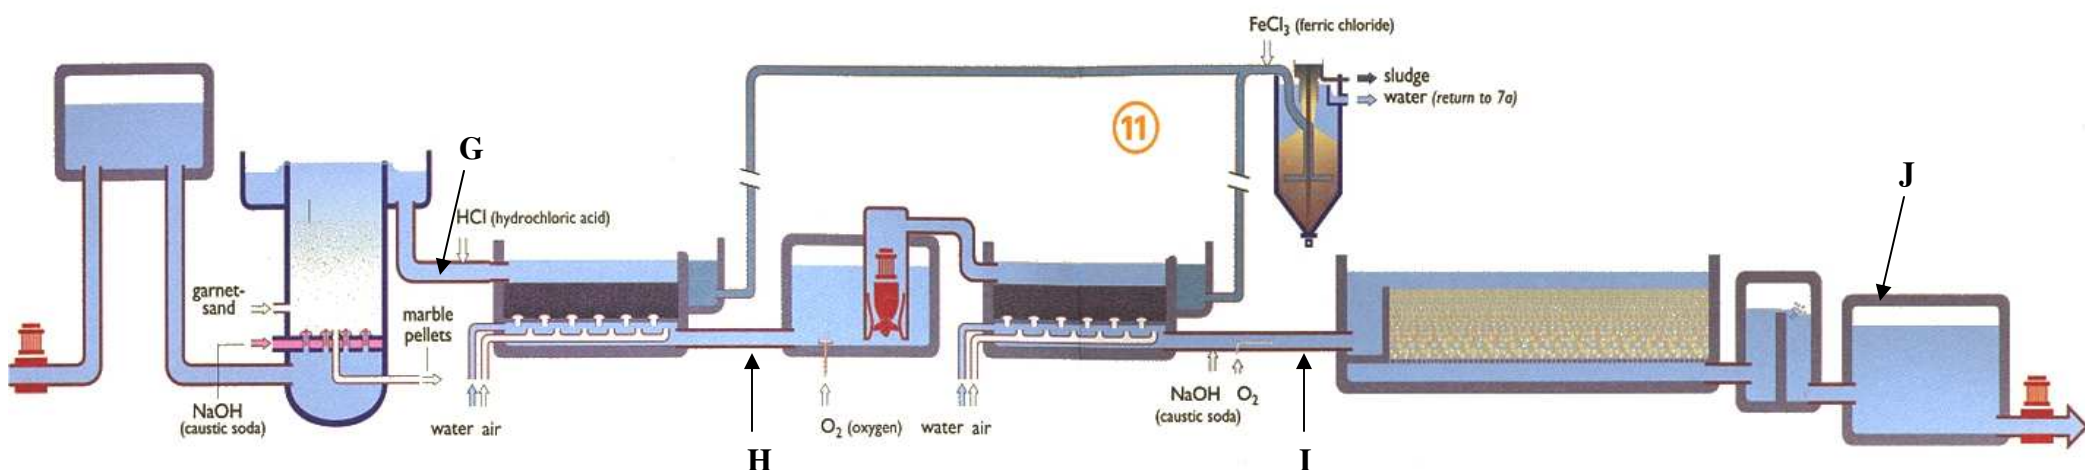

Figure S4 Post treatment (2) following Dune infiltration

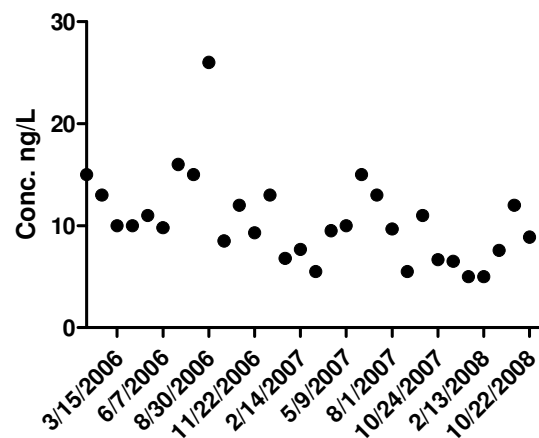

Figure S5. PFOS concentration in the Lek canal around Nieuwegein [1-3]. Data can be found at:

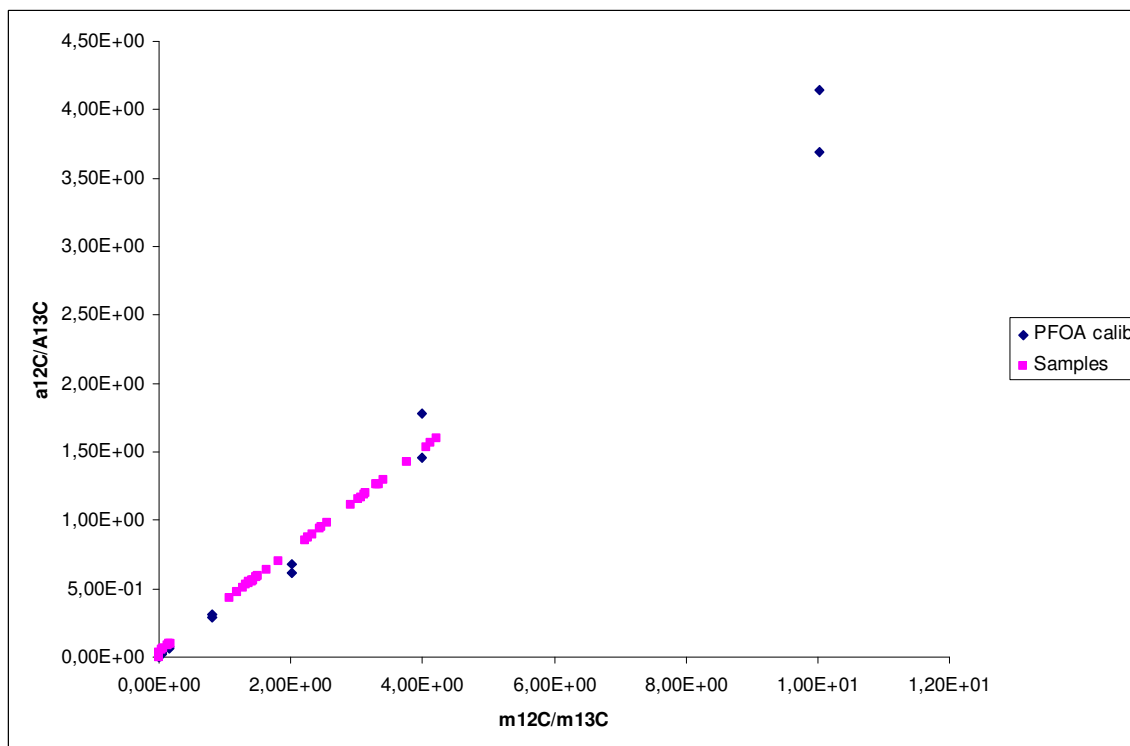

Figure S6. Calibration plot of PFOA showing responses of sample extracts relative to calibration points. Lowest samples on the calibration line are procedural blanks.



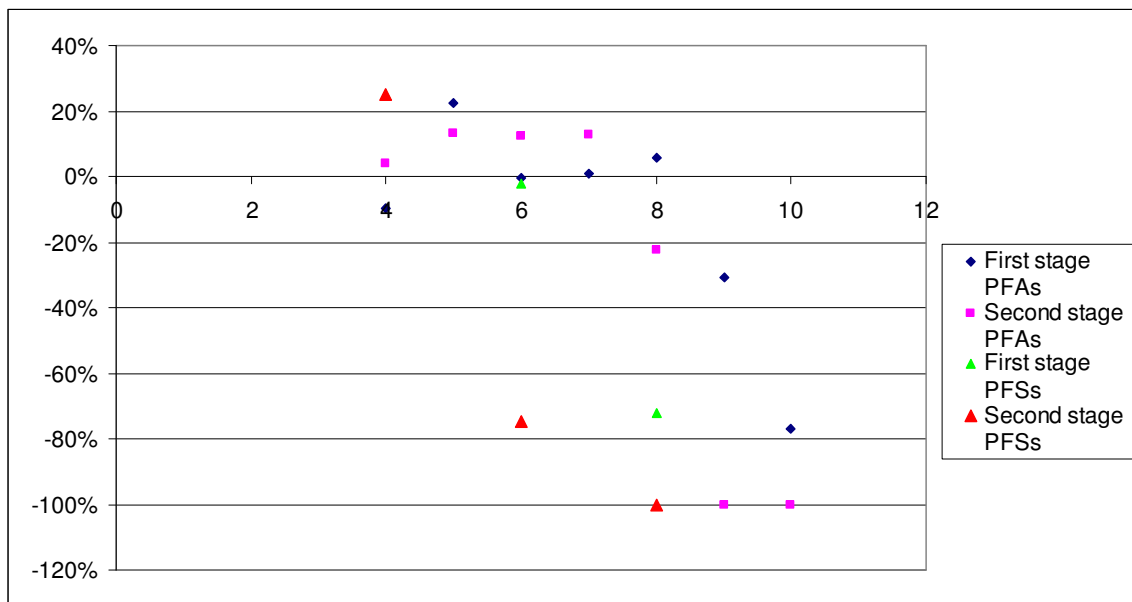

**Figure S7. Carbon chain length of the perfluorocarboxylate and perfluorosulfonates vs. the removal in the first (lead) GAC treatment step and second (lag) treatment step.**

**N14A - 12C PFOS trans 1 (Unknown) 499.0/80.0 Da - sample 57 of 127 from Waternet II 1 okt.wiff**  
**Area: 6.74e+003 counts Height: 1.31e+003 cps RT: 9.78 min**

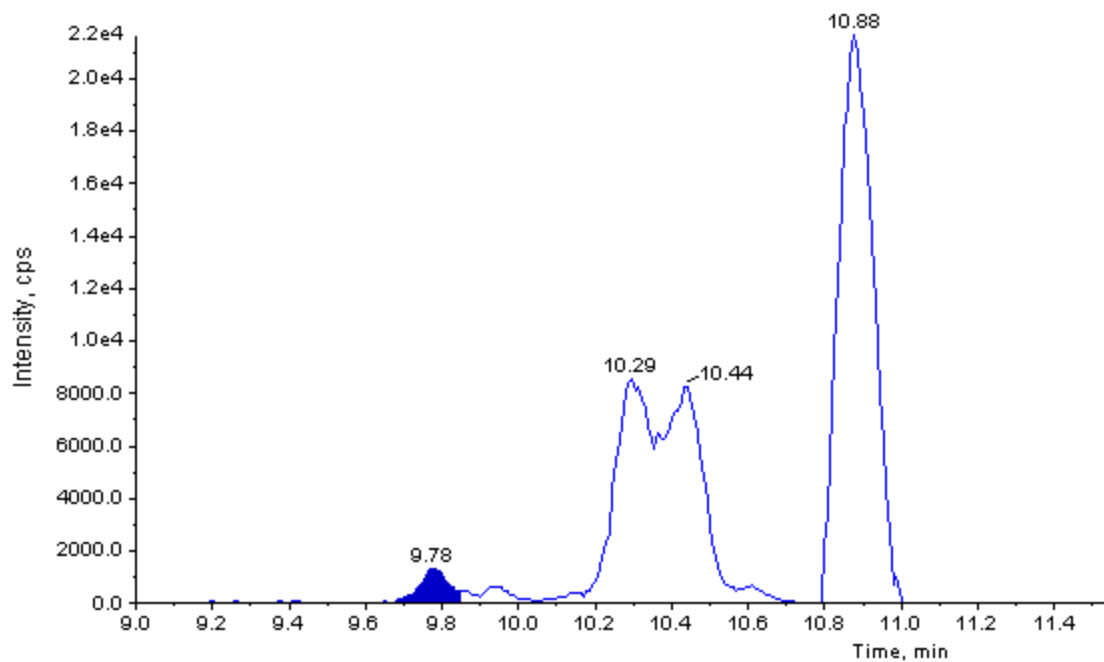

**Figure S8. PFOS transition 1 chromatogram. The branched PFOS peak at retention time 9.78 was not integrated, peaks 10.29 and 10.44 were used as branched isomers and peak 10.88 the linear PFOS (corresponding to the  $^{13}\text{C}$  labeled PFOS).**

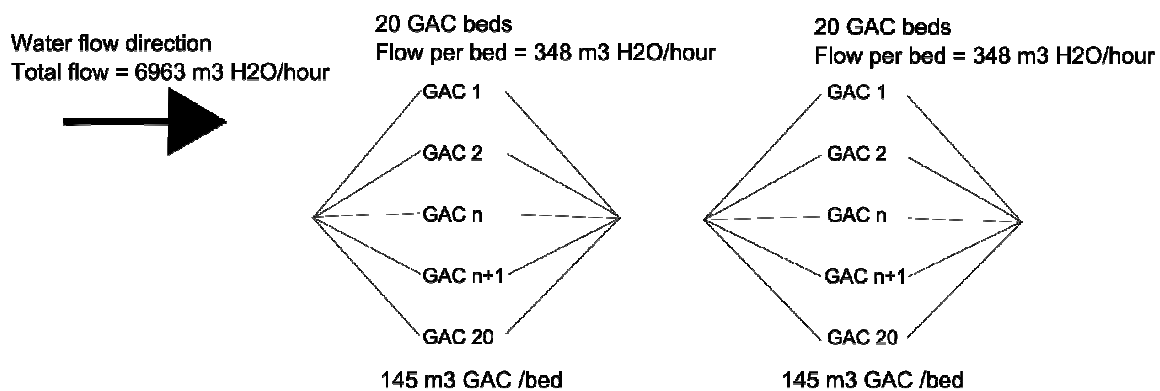

Figure S9 Scheme of the setup of the GAC filter beds in the Leiduin water treatment facility.

Table S1 Characteristics of locations sampled in the drinking water treatment processes  
(locations shown in Figures S1 to S4).

| Waternet code       | Code<br>in<br>figures | Description                             | hydraulic retention time |
|---------------------|-----------------------|-----------------------------------------|--------------------------|
| Location Nieuwegein |                       |                                         |                          |
| PNG-OW-02           | A                     | Surface water Lekkanaal intake location | 0                        |
| PNG-BB-002          | B                     | effl. coagulation                       | 5 h 24 min               |
| PNG-VSF-001         | C                     | Effl. rapid sand filtration             | 8 h 34 min               |
| Location Leiduin    |                       |                                         |                          |
| PLD-SF-INF002       | D                     | After dune passage                      | 0                        |
| PLD-SF-EFF001       | E                     | Effl. rapid sand filtration             | 0 h 45 min               |
| PLD-OH-INF001       | F                     | Effl. ozonation                         | 1 h 16 min               |
| PLD-KF-INF001       | G                     | Infl GAC filtration                     | 1 h 27 min               |
| PLD-KF-006          | H                     | Effl. First GAC filtration              | 1 h 58 min               |
| PLD-KF-001          | I                     | effl. GAC filtration                    | 2 h 24 min               |
| PLD-RW-004          | J                     | Drinking water                          | 14 h 55 min              |

**Table S2 Recoveries of the available mass labeled internal standards, field blank concentrations and LOQs<sup>1</sup>**

|       | Recovery <sup>a,b</sup><br>1st sampling round<br>(January) |        | Recovery <sup>a,b</sup><br>2nd sampling round<br>(September) |        | Blank<br>conc <sup>c</sup><br>(ng/L) | Blank<br>stdev <sup>d</sup><br>(ng/L) | LOQ <sup>e</sup><br>(ng/L) |
|-------|------------------------------------------------------------|--------|--------------------------------------------------------------|--------|--------------------------------------|---------------------------------------|----------------------------|
|       |                                                            | Range  |                                                              | Range  |                                      |                                       |                            |
| PFBA  | 52                                                         | 27-89  | 52                                                           | 9-62   | 1.5                                  | 0.8                                   | 9.5                        |
| PFPeA | -                                                          |        |                                                              |        | <LOQ                                 | 0                                     | 0.78                       |
| PFHxA | 82                                                         | 67-97  | 65                                                           | 32-65  | <LOQ                                 | 0                                     | 0.78                       |
| PFHpA | -                                                          |        |                                                              |        | <LOQ                                 | 0                                     | 0.78                       |
| PFOA  | 93                                                         | 75-116 | 74                                                           | 40-100 | 0.25                                 | 0.05                                  | 0.75                       |
| PFNA  | 82                                                         | 62-104 | 68                                                           | 36-87  | <LOQ                                 | 0                                     | 0.24                       |
| PFDA  | 81                                                         | 58-107 | 67                                                           | 30-84  | <LOQ                                 | 0                                     | 0.09                       |
| PFBS  | -                                                          |        |                                                              |        | <LOQ                                 | 0                                     | 0.21                       |
| PFHxS | 87                                                         | 73-103 | 65                                                           | 34-67  | 0.05                                 | 0.05                                  | 0.55                       |
| PFOS  | 72                                                         | 55-95  | 57                                                           | 31-73  | <LOQ                                 | 0                                     | 0.23                       |

<sup>a</sup> Recoveries were determined for the entire analytical procedure and method was described in detail before [4] (in the SI).

<sup>b</sup> The first set was extracted with a lower vacuum, resulting in a smaller extraction speed (approximately 1- 2 drops per second) and in a higher recovery. The second set (September) was extracted at a higher speed (2-3 drops per second) and resulted in a lower recovery. The relatively high stdev in the table is caused by averaging of the recoveries for the Februar and September sets.

<sup>c</sup> A total of four field blanks and three procedural blanks were analyzed

<sup>d</sup> stdev = Standard deviation.

<sup>e</sup> The (method) LOQ is defined as the lowest validated spike level meeting the method performance acceptability criteria LOQ (explained in the paper M&M section); LOQ was then calculated on the basis of a 250 mL sample. If the lowest achievable limit was determined by the method blank (PFBA, PFOA and PFHxS), the LOQ was defined as blank contribution + 10 x standard deviation of 3 replicates of the blanks.

**Table S3 Mass transitions and retention times of perfluoroalkyl carboxylic acids.**

| Compound                           | Q1 mass | Q3 mass | Transition | Retention time          |
|------------------------------------|---------|---------|------------|-------------------------|
| <sup>12</sup> C PFBA               | 213     | 169     | 1          | 2.5                     |
| <sup>12</sup> C PFPeA              | 263     | 219     | 1          | 3.2                     |
| <sup>12</sup> C PFHxA              | 313     | 269     | 1          | 4.4                     |
|                                    | 313     | 119     | 2          |                         |
| <sup>13</sup> C <sub>2</sub> PFHxA | 315     | 270     | 1          | 4.4                     |
|                                    | 315     | 119     | 2          |                         |
| <sup>12</sup> C PFHpA              | 363     | 319     | 1          | 7.2                     |
|                                    | 363     | 169     | 2          |                         |
| <sup>12</sup> C PFOA <sup>a</sup>  | 413     | 369     | 1          | 9.3                     |
|                                    | 413     | 169     | 2          | Used for quantification |
| <sup>13</sup> C <sub>4</sub> PFOA  | 417     | 372     | 1          | 9.3                     |
|                                    | 417     | 169     | 2          |                         |
| <sup>12</sup> C PFDA               | 513     | 469     | 1          | 12                      |
|                                    | 513     | 219     | 2          |                         |
| <sup>13</sup> C <sub>2</sub> PFDA  | 515     | 470     | 1          | 12                      |
|                                    | 515     | 219     | 2          |                         |
| <sup>12</sup> C PFUnA              | 563     | 519     | 1          | 12.9                    |
|                                    | 563     | 269     | 2          |                         |
| <sup>13</sup> C <sub>2</sub> PFUnA | 565     | 520     | 1          | 12.9                    |
|                                    | 565     | 269     | 2          |                         |
| <sup>12</sup> C PFDoA              | 613     | 569     | 1          | 13.7                    |
|                                    | 613     | 319     | 2          |                         |
| <sup>13</sup> C <sub>2</sub> PFDoA | 615     | 570     | 1          | 13.7                    |
|                                    | 615     | 369     | 2          |                         |
| <sup>12</sup> C PFTrA              | 663     | 619     | 1          | 14.4                    |
|                                    | 663     | 369     | 2          |                         |
| <sup>12</sup> C PFTeA              | 713     | 669     | 1          | 14.9                    |
|                                    | 713     | 369     | 2          |                         |
| <sup>12</sup> C PFHxD              | 813     | 769     | 1          | 14.9                    |
|                                    | 813     | 369     | 2          |                         |

|                       |     |     |   |      |
|-----------------------|-----|-----|---|------|
| <sup>12</sup> C PFHxD | 913 | 869 | 1 | 14.9 |
|                       | 913 | 369 | 2 |      |

<sup>a</sup>Transition 413 to 169 was used for non-branched and branched isomers of PFOA.

**Table S4 Mass transitions and retention times of perfluoroalkyl sulfonates.**

| Compound                              | Q1 mass | Q3 mass | Transition | Retention time          |
|---------------------------------------|---------|---------|------------|-------------------------|
| $^{12}\text{C}$ PFBS                  | 299     | 80      | 1          | 3.30                    |
|                                       | 299     | 99      | 2          |                         |
| $^{12}\text{C}$ PFHxS                 | 399     | 80      | 1          | 7.32                    |
|                                       | 399     | 99      | 2          |                         |
| $^{12}\text{C}$ PFOS (K) <sup>a</sup> | 499     | 80      | 1          | 10.9                    |
|                                       | 499     | 99      | 2          | used for quantification |
| $^{13}\text{C}_4$ PFOS (Na)           | 503     | 80      | 1          | 10.9                    |
|                                       | 503     | 99      | 2          |                         |
| $^{12}\text{C}$ FOSA                  | 498     | 78      | 1          | 13.2                    |
|                                       | 498     | 169     | 2          |                         |
| $^{12}\text{C}$ PFDS                  | 599     | 80      | 1          | 12.9                    |
|                                       | 599     | 99      | 2          |                         |

<sup>a</sup>Transition 499 to 99 was used for non-branched and branched isomers of PFOS.



1 **Table S5 Analytes and internal standards used**

| Abbreviation | Compounds                                 | Quantification by internal standard |
|--------------|-------------------------------------------|-------------------------------------|
| PFBA         | Perfluorobutanoic acid                    | 13C4 PFBA                           |
| PFPeA        | Perfluoropentanoic acid                   | 13C4 PFBA                           |
| PFHxA        | Perfluorohexanoic acid                    | 13C2 PFHxA                          |
| PFHpA        | Perfluoroheptanoic acid                   | 13C4 PFOA                           |
| PFOA         | Perfluorooctanoic acid                    | 13C4 PFOA                           |
| PFNA         | Perfluorononanoic acid                    | 13C5 PFNA                           |
| PFDA         | Perfluorodecanoic acid                    | 13C2 PFDA                           |
| PFUnA        | Perfluoroundecanoic acid                  | 13C2 PFUnA                          |
| PFDoA        | Perfluorododecanoic acid                  | 13C2 PFDoA                          |
| PFTTrDA      | Perfluorotridecanoic acid                 | 13C2 PFDoA                          |
| PFTeDA       | Perfluorotetradecanoic acid               | 13C2 PFDoA                          |
| PFHxD        | Perfluorohexadecanoic acid                | 13C2 PFDoA                          |
| PFOcD        | Perfluorooctanoic acid                    | 13C2 PFDoA                          |
| PFBS         | Perfluorobutane sulfonate                 | 13C4 PFOS                           |
| PFHxS        | Perfluorohexane sulfonate                 | 13C4 PFOS                           |
| PFHpS        | Perfluoroheptane sulfonate                | 13C4 PFOS                           |
| PFOS         | Perfluorooctane sulfonate                 | 13C4 PFOS                           |
| PFOSA        | Perfluorooctane sulfonamide               | 13C4 PFOS                           |
| PFDS         | Perfluorodecane sulfonate                 | 13C4 PFOSA                          |
| 13C4 PFBA    | Perfluoro[1,2,3,4-13C] butanoic acid      |                                     |
| 13C2 PFHxA   | Perfluoro [1,2-13C] hexanoic acid         |                                     |
| 13C4 PFOA    | Perfluoro [1,2,3,4-13C] octanoic acid     |                                     |
| 13C5 PFNA    | Perfluoro [1,2,3,4,5-13C] nonanoic acid   |                                     |
| 13C2 PFDA    | Perfluoro [1,2-13C] decanoic acid         |                                     |
| 13C2 PFUnA   | Perfluoro [1,2-13C] undecanoic acid       |                                     |
| 13C2 PFDoA   | Perfluoro [1,2-13C] dodecanoic acid       |                                     |
| 13C4 PFOS    | Perfluoro [1,2,3,4-13C] octane sulfonate  |                                     |
| 13C4 PFOSA   | Perfluoro [1,2,3,4-13C] octanesulfonamide |                                     |

2

3 **Table S6 Concentrations of PFAS (ng/L) observed in the river Rhine at Lobith in the year 2009 [data from 5].**

| Sampling month | PFBS | PFHxS | PFOS | PFBA | PFPeA | PFHxA | PFHpA | PFOA | ΣSum PFAS |
|----------------|------|-------|------|------|-------|-------|-------|------|-----------|
| Januar         | 16   | 2     | 9    | 6    | 1     | 4     | 0     | 3    | 41        |
| Februar        | 9    | 2     | 9    | 1    | 0     | 0     | 2     | 3    | 26        |
| March          | 3    | 1     | 9    | 0    | 0     | 0     | 2     | 2    | 17        |
| April          | 6    | 2     | 10   | 1    | 0     | 0     | 1     | 3    | 23        |
| May            | 27   | 2     | 16   | 0    | 0     | 0     | 0     | 3    | 48        |
| June           | 10   | 2     | 13   | 2    | 1     | 2     | 0     | 3    | 33        |
| July           | 15   | 2     | 28   | 5    | 0     | 0     | 2     | 5    | 57        |
| August         | 50   | 2     | 13   | 120  | 0     | 0     | 0     | 5    | 190       |
| September      | 25   | 3     | 14   | 110  | 1     | 0     | 2     | 6    | 161       |
| Oktober        | 70   | 3     | 18   | 53   | 0     | 0     | 2     | 5    | 151       |
| November       | 24   | 4     | 14   | 71   | 2     | 4     | 0     | 9    | 128       |
| December       | 8    | 0     | 7    | 40   | 0     | 0     | 0     | 4    | 59        |
| Average        | 21.9 | 2.1   | 13.3 | 34.1 | 0.4   | 0.8   | 0.9   | 4.3  | 77.8      |

7 **Table S7 Concentrations of PFOS and PFOA (ng/L) observed in the Lek canal at Nieuwegein in the period 2006 to 2008 [data from 1-3].**

| Sampling date | PFOS | PFOA | Sampling date | PFOS | PFOA | Sampling date | PFOS | PFOA |
|---------------|------|------|---------------|------|------|---------------|------|------|
| 1/18/2006     | 15   | 13   | 1/17/2007     | 6.8  | 5    | 2/13/2008     | 5    | 5    |
| 2/15/2006     | 13   | 13   | 2/14/2007     | 7.7  | 5    | 5/7/2008      | 7.6  | 5    |
| 3/15/2006     | 10   | 10   | 3/14/2007     | 5.5  | 5    | 7/30/2008     | 12   | 6.5  |
| 4/19/2006     | 10   | 5    | 4/11/2007     | 9.5  | 6.1  | 10/22/2008    | 8.9  | 7.8  |
| 5/10/2006     | 11   | 5.4  | 5/9/2007      | 10   | 11   |               |      |      |
| 6/7/2006      | 9.8  | 5    | 6/6/2007      | 15   | 6.4  |               |      |      |
| 7/5/2006      | 16   | 5.4  | 7/4/2007      | 13   | 5    |               |      |      |
| 8/2/2006      | 15   | 5    | 8/1/2007      | 9.7  | 5    |               |      |      |
| 8/30/2006     | 26   | 5    | 8/29/2007     | 5.5  | 5    |               |      |      |
| 9/27/2006     | 8.5  | 6.1  | 9/26/2007     | 11   | 5    |               |      |      |
| 10/25/2006    | 12   | 12   | 10/24/2007    | 6.7  | 9.6  |               |      |      |
| 11/22/2006    | 9.3  | 5    | 11/21/2007    | 6.5  | 5    |               |      |      |
| 12/20/2006    | 13   | 5    | 12/19/2007    | 5    | 5    |               |      |      |

12 **Table S8 Average PFAA concentration at the effluent of three sampled young GAC beds and three sampled old GAC beds.**

|        | young | stdev | old  | stdev |
|--------|-------|-------|------|-------|
| PFBA   | 31    | 1,6   | 31   | 1,5   |
| PFPeA  | 1,7   | 0,2   | 1,9  | 0,2   |
| PFHxA  | 4,6   | 0,1   | 4,8  | 0,1   |
| PFHpA  | 4,2   | 0,4   | 4,4  | 0,6   |
| PFOA L | 13    | 0,8   | 11   | 1,3   |
| PFNA   | <LOQ  |       | <LOQ |       |
| PFDA   | <LOQ  |       | <LOQ |       |

|        |     |     |     |     |
|--------|-----|-----|-----|-----|
| PFBS   | 21  | 1,3 | 24  | 1,5 |
| PFHxS  | 4,6 | 0,2 | 3,0 | 0,5 |
| PFOS L | 3,7 | 0,8 | 2,0 | 0,8 |

---

## References

1. RIWA *Jaarrapport 2006: De Rijn*; RIWA Rijnwaterbedrijven 2007. [http://www.riwa-rijn.org/uploads/tx\\_deriva/150\\_JR\\_2006\\_ne.pdf](http://www.riwa-rijn.org/uploads/tx_deriva/150_JR_2006_ne.pdf) page 108.
2. RIWA *Jaarrapport 2007: De Rijn*; RIWA Rijnwaterbedrijven 2008. [http://www.riwa-rijn.org/uploads/tx\\_deriva/157\\_JR\\_2007\\_nl.pdf](http://www.riwa-rijn.org/uploads/tx_deriva/157_JR_2007_nl.pdf) page 99;
3. RIWA *Jaarrapport 2008: De Rijn*; RIWA Rijnwaterbedrijven 2009. [http://www.riwa-rijn.org/uploads/tx\\_deriva/166\\_JR\\_2008\\_NL.pdf](http://www.riwa-rijn.org/uploads/tx_deriva/166_JR_2008_NL.pdf) page 74;
4. Eschauzier, C.; Haftka, J.; Stuyfzand, P. J.; De Voogt, P. Perfluorinated compounds in infiltrated river rhine water and infiltrated rainwater in coastal dunes. *Environmental Science and Technology* **2010**, *44*, (19), 7450-7455.
5. RIWA *Jaarrapport 2009: De Rijn*; RIWA Rijnwaterbedrijven 2010. [http://www.riwa-rijn.org/uploads/tx\\_deriva/173\\_JR2009\\_Ned.pdf](http://www.riwa-rijn.org/uploads/tx_deriva/173_JR2009_Ned.pdf) page 97.
